# Supplementary material
Source: HighWire-hosted journal article supplement (https://www.jrheum.org/highwire/filestream/29821/field_highwire_adjunct_files/0/160592DataSuppl.pdf)
Supplement: 160592DataSuppl.pdf [file 160592DataSuppl.pdf]

## ONLINE SUPPLEMENTARY DATA

*Supplementary Table 1.* Clinical variables values, in the two patient groups (ILO and ILO+BOSE), for each follow up year, with baseline and overall significant differences reported.

| CLINICAL VARIABLES   | STATISTICAL TEST    | PATIENTS GROUP          | T0                  | T1          | T2        | T3           | T4           | T0-T4<br>p<br>R <sup>2</sup><br>r                                                                |
|----------------------|---------------------|-------------------------|---------------------|-------------|-----------|--------------|--------------|--------------------------------------------------------------------------------------------------|
| NEW DUs<br>INCIDENCE | Cochran's<br>Q Test | ILO+<br>BOSE            | 10/15               | 4/15        | 2/15      | 4/15         | 2/15         | 0.0042                                                                                           |
| DLCO<br>%            | Friedman's<br>Test  | ILO+<br>BOSE            | 64.3 ±16            | 64.5<br>±21 | 67.6 ±19  | 73.2 ±27     | 70.2 ±28     | 0.46                                                                                             |
|                      |                     | ILO                     | 81.3 ±16<br>p=0.02  | 82.9 ±15    | 72.3 ±14  | 71 ±15       | 74.7 ±24     | 0.039                                                                                            |
|                      | Correlation         | ILO+<br>BOSE<br><br>ILO |                     |             |           |              |              | 0.15<br>0.55<br>-0.74<br>-0.9817 to 0.4050 CI<br><br>0.04<br>0.8<br>-0.89<br>-0.9931 to -0.05777 |
|                      | Friedman's<br>Test  | ILO+<br>BOSE            | 34.6 ±9             | 36<br>±4    | 34.8 ±6.4 | 34.6<br>±6.7 | 34.5<br>±7.1 | 0.8                                                                                              |
|                      |                     | ILO                     | 29.3 ±3.4<br>p=0.01 | 33<br>±7    | 33.7 ±5.4 | 32.5<br>±5.6 | 33.7<br>±6.6 | 0.04                                                                                             |

|                      |                    |              |                      |               |            |              |              |                                            |
|----------------------|--------------------|--------------|----------------------|---------------|------------|--------------|--------------|--------------------------------------------|
| <b>sPAP<br/>mmHg</b> | Correlation        | ILO+<br>BOSE |                      |               |            |              |              | 0.42<br>0.22<br>-0.47<br>-0.9563 to 0.7021 |
|                      |                    | ILO          |                      |               |            |              |              |                                            |
| <b>RI</b>            | Friedman's<br>Test | ILO+<br>BOSE | 0.66 ±0.06           | 0.68<br>±0.04 | 0.7 ±0.05  | 0.67<br>±0.1 | 0.67±0.1     | 0.6                                        |
|                      |                    | ILO          | 0.69 ±0.06<br>p=0.22 | 0.68 ±0.05    | 0.69 ±0.05 | 0.69<br>±0.1 | 0.68<br>±0.1 | 0.9                                        |
|                      | Correlation        | ILO+<br>BOSE |                      |               |            |              |              | 0.92<br>0.003<br>0.05<br>-0.8688 to 0.8946 |
|                      |                    | ILO          |                      |               |            |              |              | 0.29<br>0.35<br>-0.5<br>-0.9685 to 0.6073  |
| <b>ESR<br/>mm</b>    | Friedman's<br>Test | ILO+<br>BOSE | 34.8 ±27.4           | 34.6 ± 26.3   | 42.6 ±25   | 47.1<br>±30  | 43.9±27      | 0.07                                       |
|                      |                    | ILO          | 39 ±25.3<br>p=0.47   | 32.7 ±17.7    | 28 ±9.3    | 29.9 ±17     | 31.7<br>±21  | 0.28                                       |
|                      | Correlation        | ILO+<br>BOSE |                      |               |            |              |              | 0.06<br>0.7<br>0.8<br>-0.08880 to 0.9907   |
|                      |                    | ILO          |                      |               |            |              |              | 0.2<br>0.43<br>-0.6<br>-0.9750 to 0.5284   |

|              |                    |              |                    |             |           |        |          |                                     |
|--------------|--------------------|--------------|--------------------|-------------|-----------|--------|----------|-------------------------------------|
| CRP<br>mg/dl | Friedman's<br>Test | ILO+<br>BOSE | 5<br>±2.7          | 5.4<br>±3.5 | 6.3 ±3.9  | 14 ±22 | 8.4 ±8.8 | 0.17                                |
|              |                    | ILO          | 5.9 ±7.2<br>p=0.05 | 4.5 ±4.4    | 3<br>±0.2 | 3 ±0.1 | 4.2 ±4.7 | 0.2                                 |
|              | Correlation        | ILO+<br>BOSE |                    |             |           |        |          | 0.006                               |
|              |                    | ILO          |                    |             |           |        |          | 0.9<br>0.9<br><br>0.2<br>0.4<br>-06 |

DUs= Digital Ulcers, DLCO= diffusing capacity of the lungs for carbon monoxide; sPAP= systolic pulmonary arterial pressure; RI= renal artery resistive index; ESR= erythrocyte sedimentation rate; CRP= C-reactive protein.

*Supplementary Table 2.* Instrumental variables values, in the two patients groups (ILO and ILO+BOSE), for each follow up year, with baseline and overall significant differences reported.

| INSTRUMENTAL VARIABLES               | STATISTICAL TEST   | PATIENTS GROUP          | T0                             | T1                    | T2                    | T3                    | T4                    | OVERALL FU<br>p<br>R <sup>2</sup><br>SLOPE                                    |
|--------------------------------------|--------------------|-------------------------|--------------------------------|-----------------------|-----------------------|-----------------------|-----------------------|-------------------------------------------------------------------------------|
| CAPILLARIES<br>ABSOLUTE<br>NUMBER/mm | Friedman's<br>Test | ILO+<br>BOSE            | 6.8<br>±1.3                    | 7.3 ±1.6              | 7.6 ±1.8              | 7.7<br>±1.5           | 7.8 ±1.5              | 0.018                                                                         |
|                                      |                    | ILO                     | 7.18 ±0.5<br>p=0.42            | 6.8 ±0.9              | 6.7 ±0.9              | 6.6<br>±1.1           | 6.5 ±1.1              | 0.29                                                                          |
|                                      | Correlation        | ILO+<br>BOSE<br><br>ILO |                                |                       |                       |                       |                       | 0.02<br>0.86<br>0.06686 to 0.4014<br><br>0.089<br>0.92<br>-0.2211 to -0.06916 |
| CAPILLARY NUMBER<br>SCORE            | $\chi^2$           | ILO+<br>BOSE            | 1= 4<br>2= 8<br>3= 3           | 1= 2<br>2= 11<br>3= 2 | 1= 2<br>2= 11<br>3= 2 | 1= 4<br>2= 9<br>3= 2  | 1= 6<br>2= 7<br>3= 2  | 0.77                                                                          |
|                                      |                    | ILO                     | 1= 6<br>2= 8<br>3= 1<br>p=0.49 | 1= 2<br>2= 12<br>3= 1 | 1= 4<br>2= 10<br>3= 1 | 1= 2<br>2= 12<br>3= 1 | 1= 3<br>2= 11<br>3= 1 | 0.82                                                                          |
|                                      | Friedman's<br>Test | ILO+<br>BOSE            | 67.3 ±31.7<br>91 ±47.4         | 83.8 ±33<br>85.7 ±43  | 99 ±34<br>76.7 ±43    | 103 ±32<br>72.3 ±43   | 104 ±31<br>71 ±37     | < 0.0001                                                                      |
|                                      |                    | ILO                     | p=0.08                         |                       |                       |                       |                       | 0.079                                                                         |

|                       |                 |                      |                                  |                        |                    |                      |                    |                                                                           |
|-----------------------|-----------------|----------------------|----------------------------------|------------------------|--------------------|----------------------|--------------------|---------------------------------------------------------------------------|
| <b>FBP (PU):</b>      | Correlation     | ILO+ BOSE<br><br>ILO |                                  |                        |                    |                      |                    | 0.03<br>0.83<br>1.599 to 16.62<br><br>0.02<br>0.86<br>-7.927 to -1.325    |
| <b>FBP 36°C (PU):</b> | Friedman's Test | ILO+ BOSE<br><br>ILO | 96.47 ±51<br>138.9 ±50<br>p=0.05 | 116.9 ±51<br>122.4 ±51 | 141 ±65<br>109 ±52 | 137 ±64<br>101 ±52   | 141 ±57<br>104 ±50 | 0.0001<br><br>0.0009                                                      |
|                       | Correlation     | ILO+ BOSE<br><br>ILO |                                  |                        |                    |                      |                    | 0.05<br>0.76<br>-0.2781 to 24.58<br><br>0.04<br>0.78<br>-13.70 to -0.1787 |
| <b>Δ FBP:</b>         | Friedman's Test | ILO+ BOSE<br><br>ILO | 37 ±31<br>45.8 ±3<br>p=0.16      | 40 ±32<br>38.4 ±28     | 51 ±40<br>36.5 ±26 | 43.7 ±43<br>32.6 ±24 | 47 ±38<br>28 ±24   | 0.47<br><br>0.08                                                          |
|                       | Correlation     | ILO+ BOSE<br><br>ILO |                                  |                        |                    |                      |                    | 0.63<br>0.08<br>-6.994 to 9.768<br><br>0.03<br>0.83<br>-7.859 to -0.7637  |

|                          |                 |           |   |   |            |            |            |                        |
|--------------------------|-----------------|-----------|---|---|------------|------------|------------|------------------------|
| <b>LASCA F<br/>(PU):</b> | Friedman's Test | ILO+ BOSE | / | / | 103<br>±22 | 120<br>±24 | 132<br>±27 | 0.045                  |
|                          |                 | ILO       | / | / | 107<br>±28 | 99<br>±28  | 99<br>±18  | 0.3                    |
|                          | Correlation     | ILO+ BOSE |   |   |            |            |            | 0.07<br>0.99<br>0.98   |
| <b>LASCA P<br/>(PU):</b> |                 | ILO       |   |   |            |            |            | 0.32<br>-0.8<br>0.7    |
|                          | Friedman's Test | ILO+ BOSE | / | / | 106<br>±31 | 124<br>±27 | 143<br>±18 | 0.05                   |
|                          |                 | ILO       | / | / | 115<br>±30 | 107<br>±30 | 100<br>±33 | 0.27                   |
| <b>LASCA P<br/>(PU):</b> | Correlation     | ILO+ BOSE |   |   |            |            |            | 0.0018<br>1<br>1       |
|                          |                 | ILO       |   |   |            |            |            | 0.045<br>-0.99<br>0.99 |

FBP= Fingertip blood perfusion at basal skin temperature; PU= Perfusion units; FBP 36°= Fingertip blood perfusion after probe heating; ΔFBP: Perfusion gradient= FBP 36°- FBP; LASCA F= laser speckle contrast analysis of the fingertip region; LASCA P= laser speckle contrast analysis of the periungueal region.

*Supplementary Figure 1.* Scleroderma patient (66 years old) belonging to the group on therapy with iloprost and bosentan. In the upper part LASCA images for three follow-up years with relative perfusion measurements are displayed. A gradual improvement in both Fingertip and Periungueal region of interest is reported. In the lower part of the image, the capillaroscopic pictures of the same follow up years with the number of capillaries per mm, indicated by the arrows. A gradual rise in absolute capillary number/mm is observed from 2012 to 2014 (overall average rise in absolute capillary number from T0 to T4: 6.8 - 7.8/mm,  $p=0.018$ ). The NVC images of present patient were always taken at the level of the third finger/right hand, according to the optimized methods reported in Reference 1. It is evident the increased density of capillaries in all the field behind the first row, as consequence of the intensive remodelling over the years (green bar placed by the software according to the validated methods Reference 1).

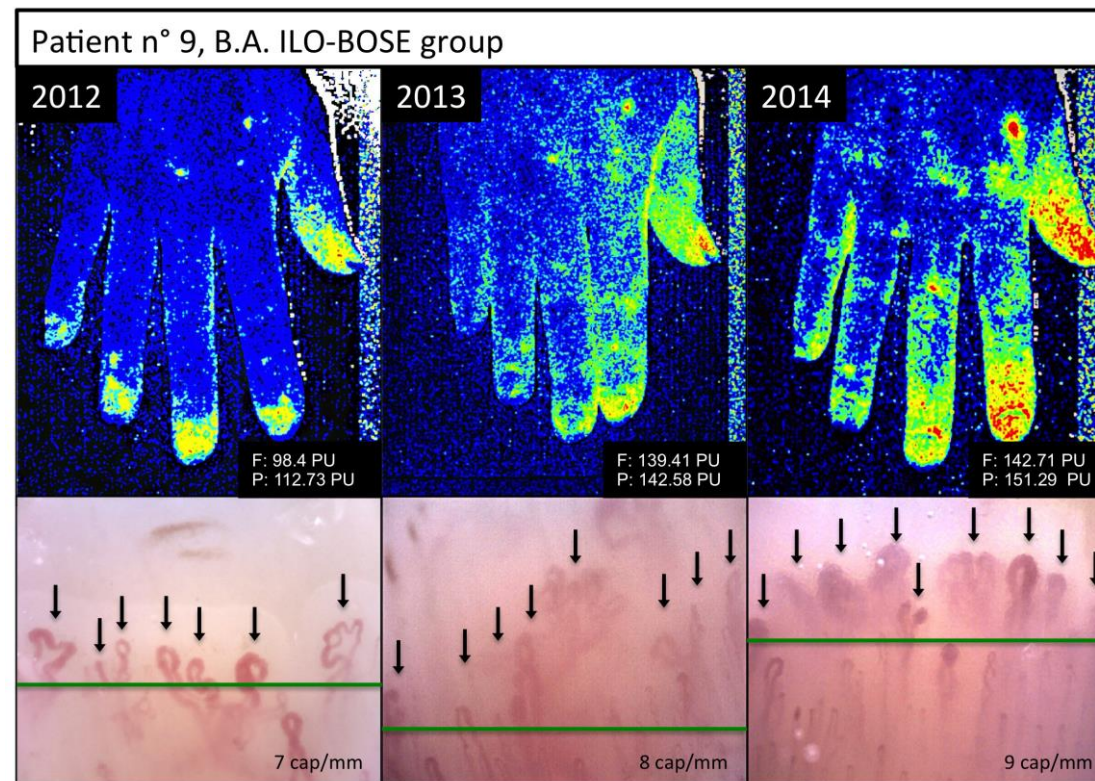

ILO-BOSE: Iloprost and bosentan therapy; F= Fingertip; P= Periungueal; PU= Perfusion Unit; NVC= Nailfold videocapillaroscopy.

#### References

1. Cutolo M, Herrick AL, Distler O, Becker M, Beltran E, Carpentier P, et al. Nailfold videocapillaroscopic and other clinical risk factors for digital ulcers in systemic sclerosis: a multicenter, prospective cohort study. *Arthritis Rheumatol* 2016 Apr 25 (E-pub ahead of print).
